# Supplementary material for: 3,5-Bis(dithioacetal) meso-aryl BODIPYs: selective chemodosimeters for Hg(ii) ions
Source: Royal Society of Chemistry journal article supplement (doi:10.1039/c4nj00593g), 2014-06-03
Supplement: c4nj00593g1.pdf [file c4nj00593g1.pdf]

## Supporting Information

### 3,5-Bis(dithioacetal) *meso*-aryl BODIPYs: Selective Chemodosimeter for Hg(II) ion

Sheri Madhu, Sk Josimuddin and Mangalampalli Ravikanth\*

Department of Chemistry, Indian Institute of Technology Bombay, Powai,

Mumbai 400 076, India. E-mail: [ravikanth@chem.iitb.ac.in](mailto:ravikanth@chem.iitb.ac.in)

| Entry | Contents                                                                                | Page no    |
|-------|-----------------------------------------------------------------------------------------|------------|
| 1     | <b>Figure S1.</b> HR mass spectrum of BODIPY <b>1</b>                                   | <b>S1</b>  |
| 2     | <b>Figure S2.</b> <sup>1</sup> H NMR spectrum of BODIPY <b>1</b> in CDCl <sub>3</sub>   | <b>S2</b>  |
| 3     | <b>Figure S3.</b> <sup>13</sup> C NMR spectrum of BODIPY <b>1</b> in CDCl <sub>3</sub>  | <b>S3</b>  |
| 4     | <b>Figure S4.</b> <sup>19</sup> F NMR spectrum of BODIPY <b>1</b> in CDCl <sub>3</sub>  | <b>S4</b>  |
| 5     | <b>Figure S5.</b> <sup>11</sup> B NMR spectrum of BODIPY <b>1</b> in CDCl <sub>3</sub>  | <b>S5</b>  |
| 6     | <b>Figure S6.</b> HR mass spectrum of BODIPY <b>2</b>                                   | <b>S6</b>  |
| 7     | <b>Figure S7.</b> <sup>1</sup> H NMR spectrum of BODIPY <b>2</b> in CDCl <sub>3</sub>   | <b>S7</b>  |
| 8     | <b>Figure S8.</b> <sup>13</sup> C NMR spectrum of BODIPY <b>2</b> in CDCl <sub>3</sub>  | <b>S8</b>  |
| 9     | <b>Figure S9.</b> <sup>19</sup> F NMR spectrum of BODIPY <b>2</b> in CDCl <sub>3</sub>  | <b>S9</b>  |
| 10    | <b>Figure S10.</b> <sup>11</sup> B NMR spectrum of BODIPY <b>2</b> in CDCl <sub>3</sub> | <b>S10</b> |
| 11    | <b>Figure S11.</b> Absorption, emission spectra of <b>1</b> in different solvents       | <b>S11</b> |
| 12    | <b>Figure S12.</b> Absorption, emission spectra of <b>2</b> in different solvents       | <b>S12</b> |
| 13    | <b>Figure S13.</b> Fluorescence decay profile of BODIPY <b>1</b> in CHCl <sub>3</sub>   | <b>S13</b> |
| 14    | <b>Figure S14.</b> Emission changes of BODIPY <b>1</b> with Hg(II) ion                  | <b>S14</b> |
| 15    | <b>Figure S15.</b> Detection limit experiment for <b>1</b> with Hg(II) ion              | <b>S15</b> |
| 16    | <b>Figure S16.</b> HR-MS of BODIPY <b>1</b> upon addition Hg(II) ion                    | <b>S16</b> |

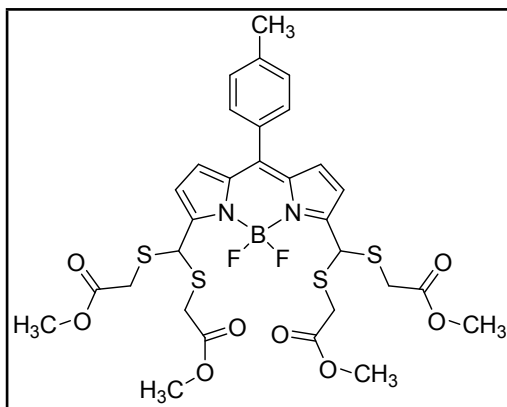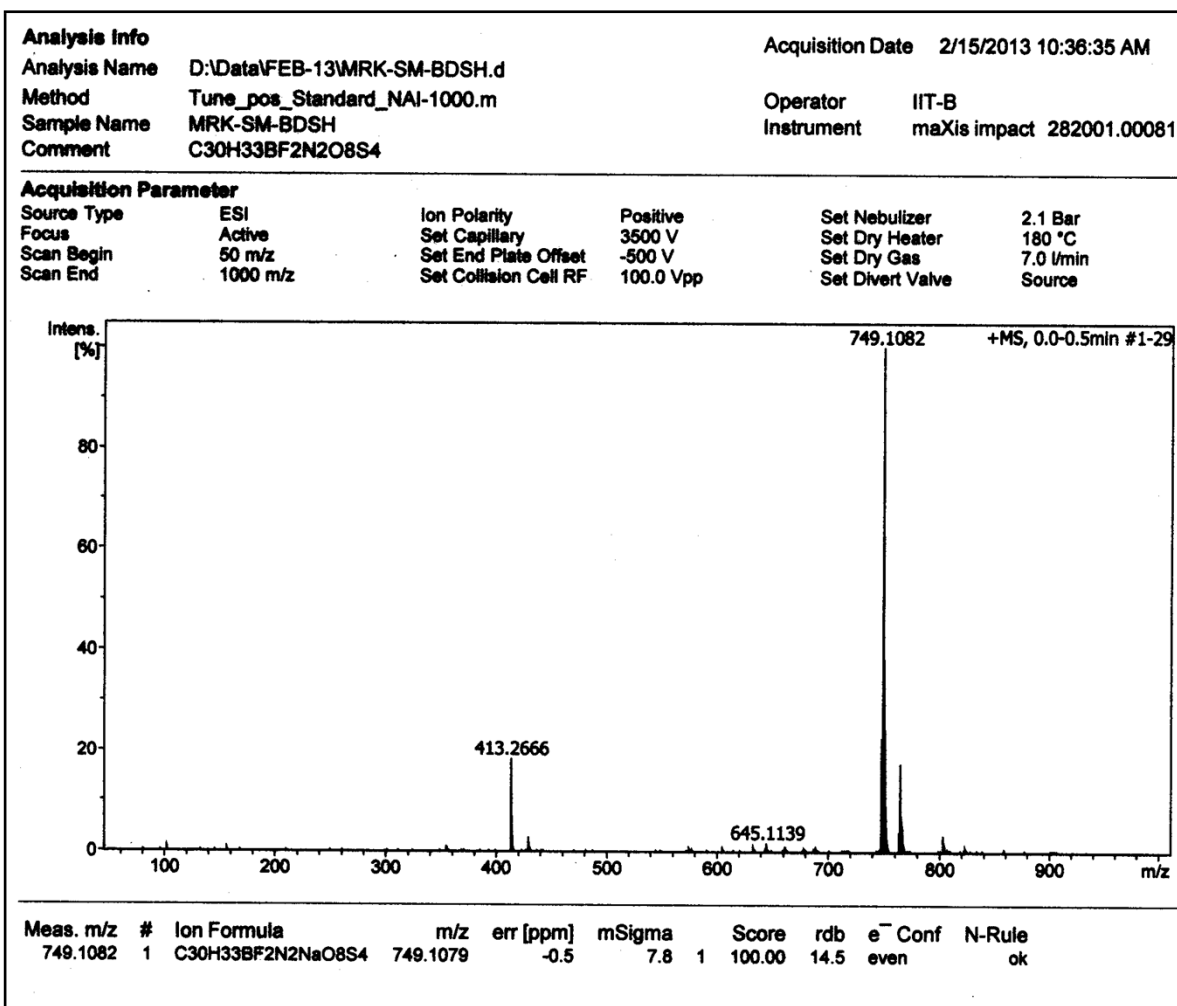

Figure S1: HR mass spectrum of BODIPY 1

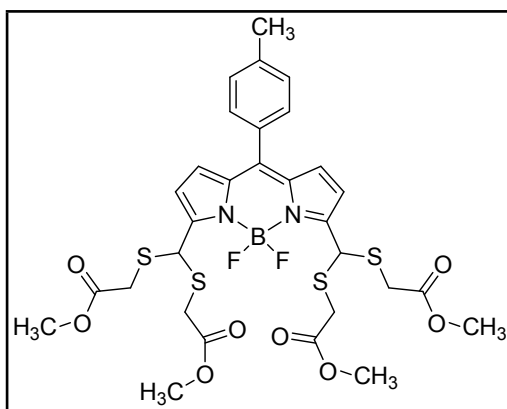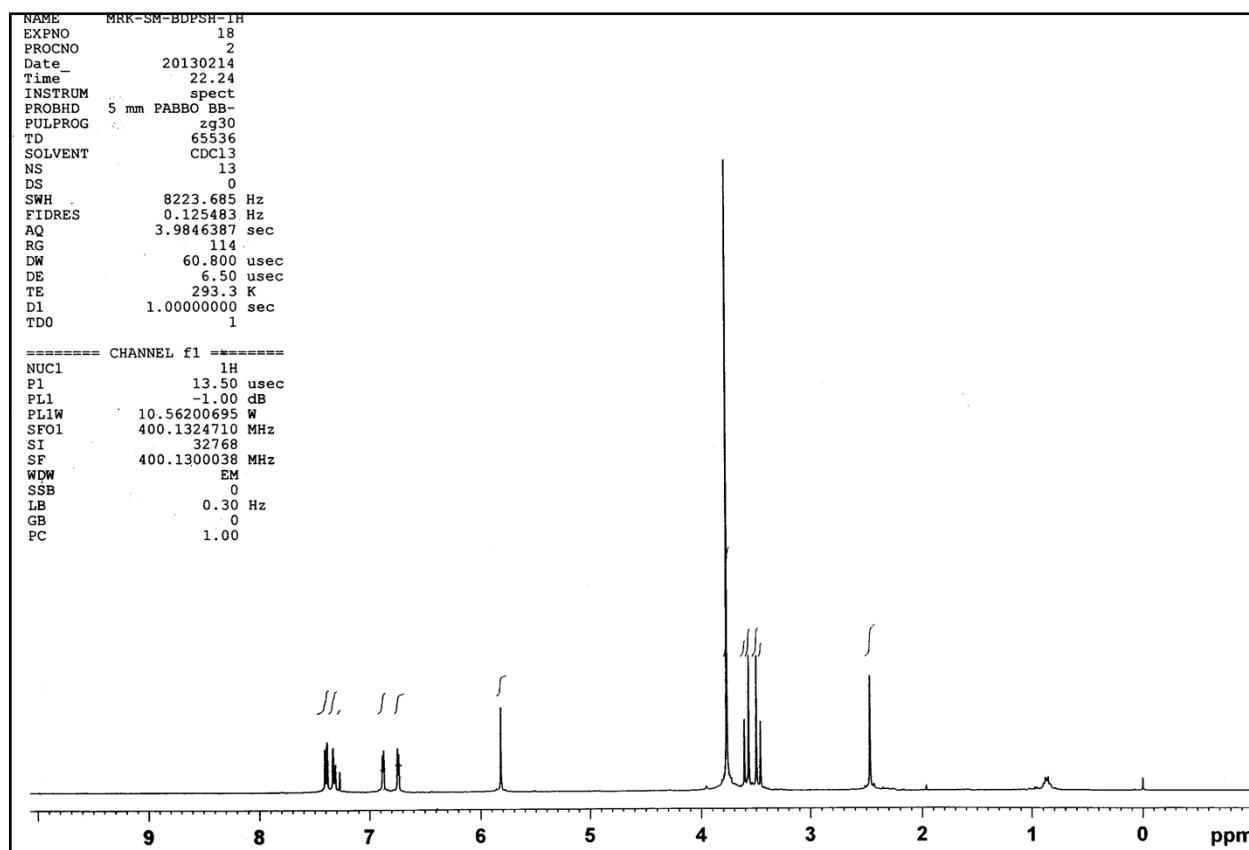

**Figure S2:**  $^1\text{H}$  NMR spectrum of BODIPY **1** recorded in  $\text{CDCl}_3$

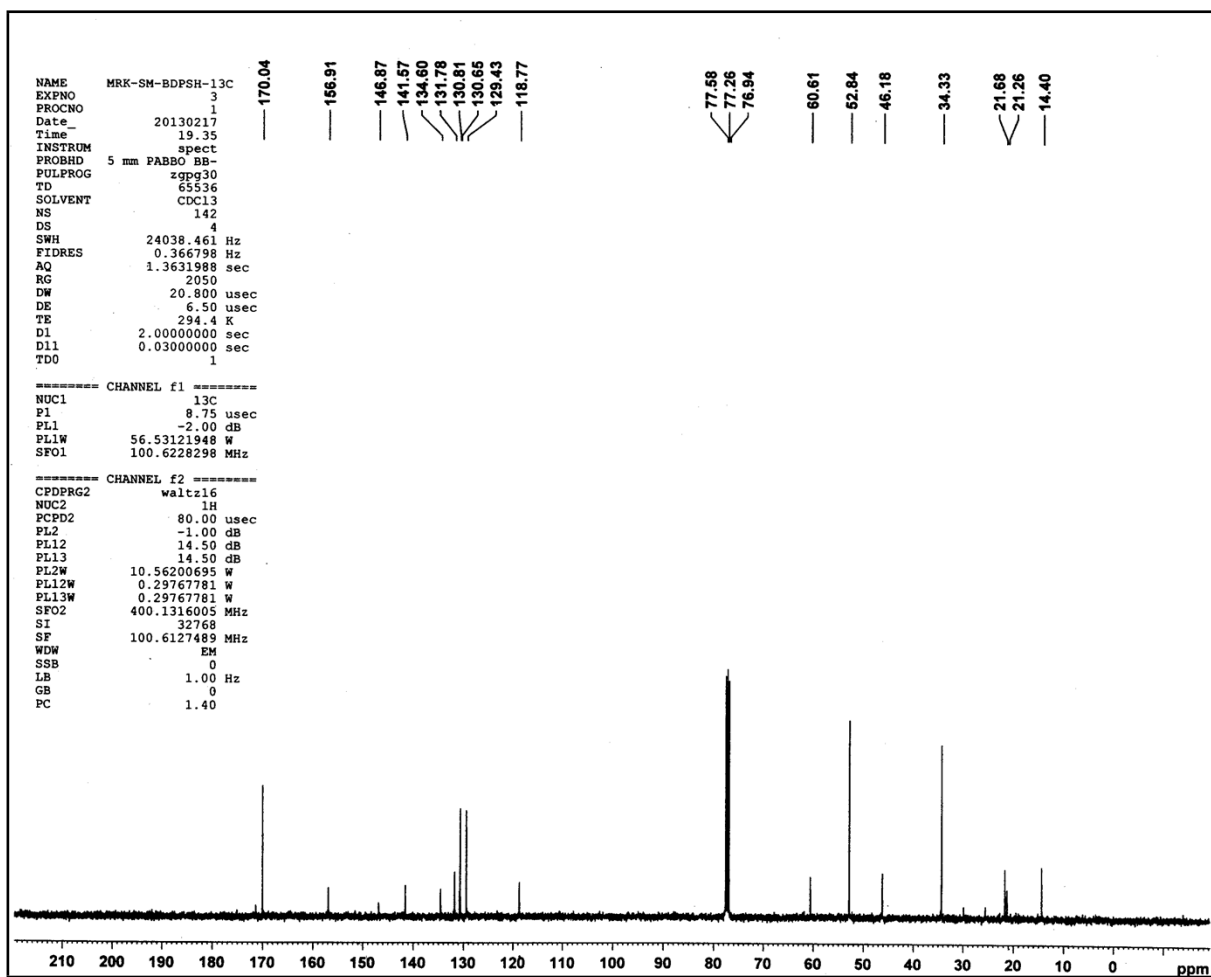

Figure S3:  $^{13}\text{C}$  NMR spectrum of BODIPY 1 recorded in  $\text{CDCl}_3$

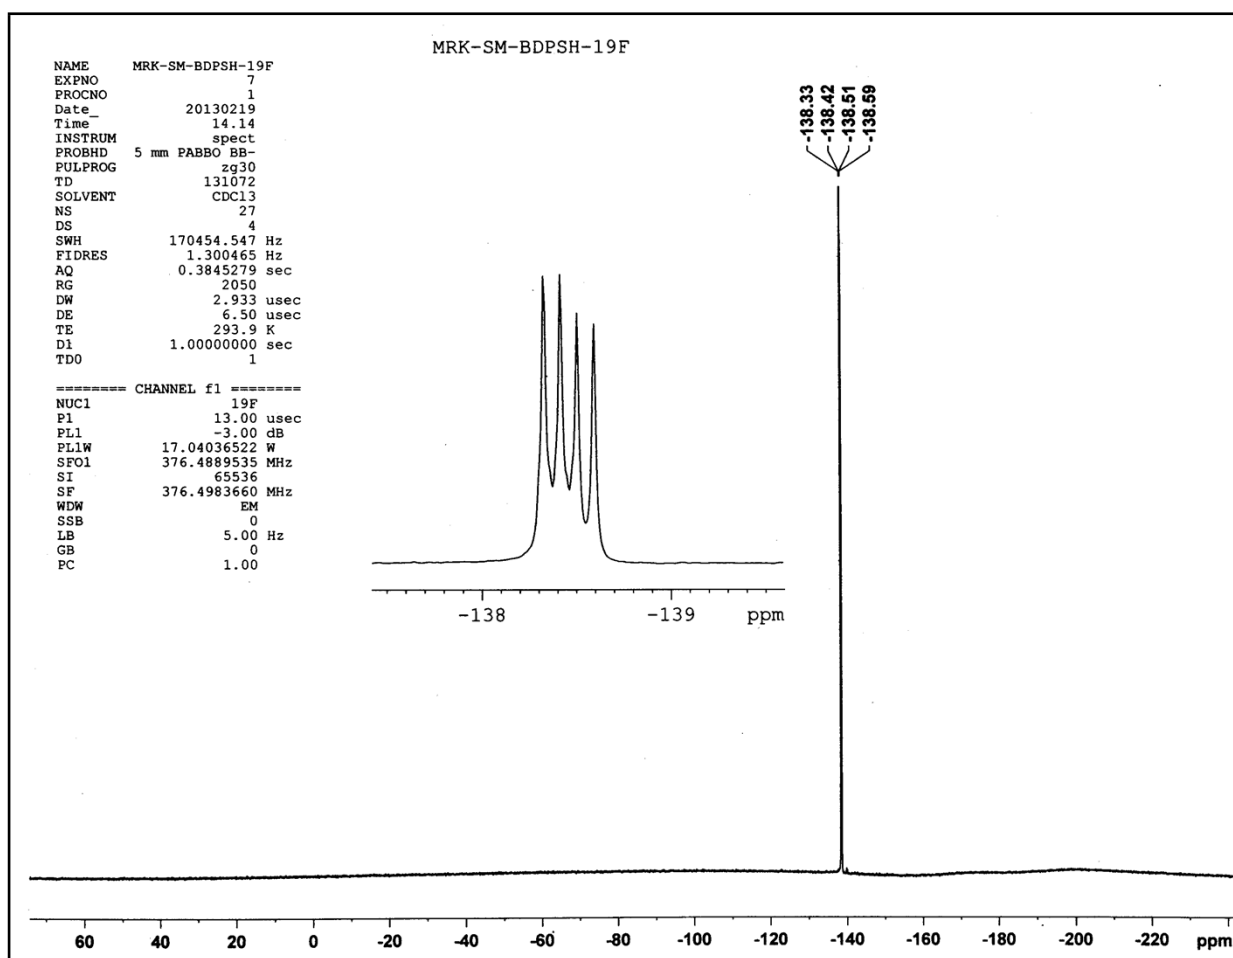

**Figure S4:**  $^{19}\text{F}$  NMR spectrum of BODIPY 1 recorded in  $\text{CDCl}_3$ . Inset shows the expansion

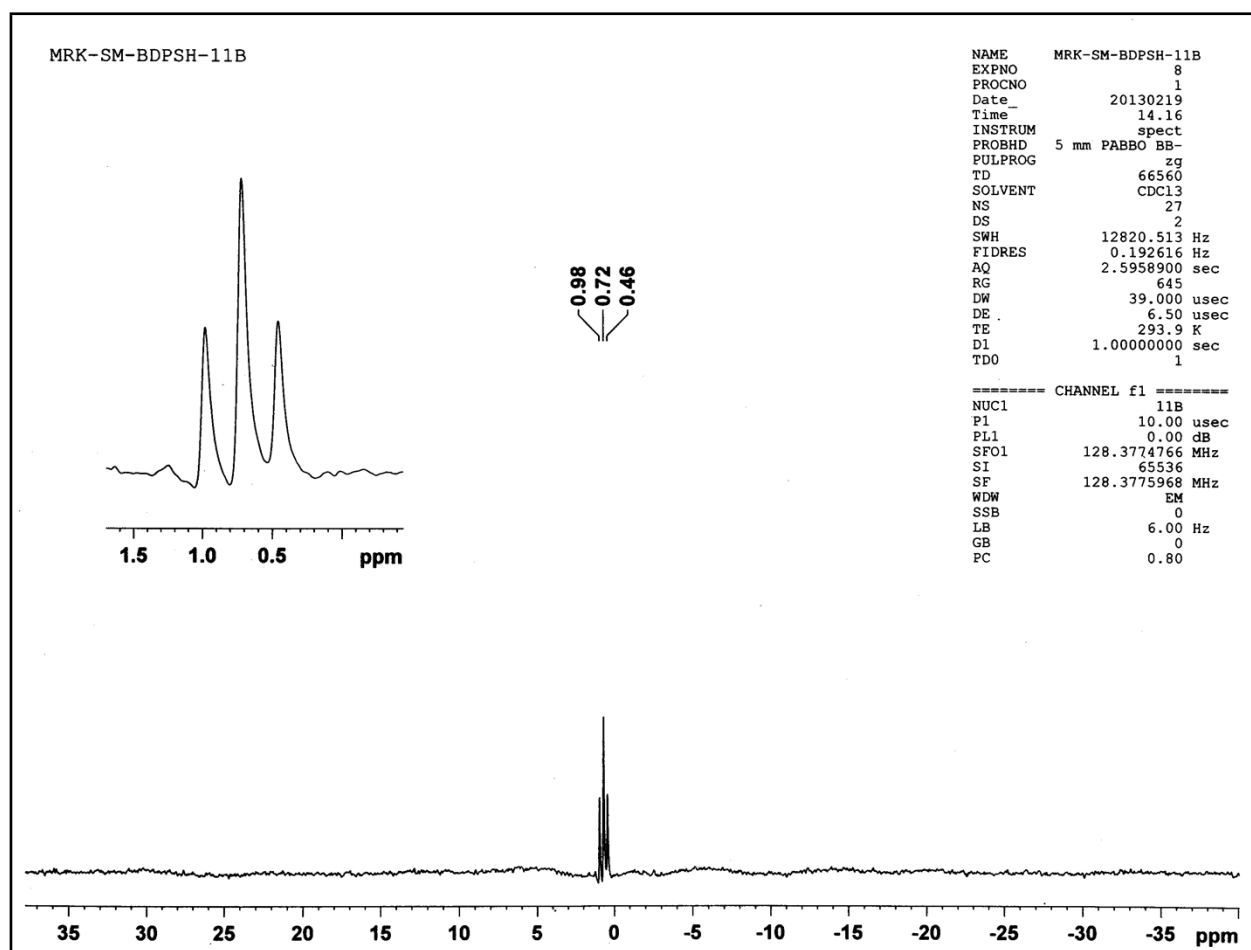

Figure S5:  $^{11}\text{B}$  NMR spectrum of BODIPY 1 recorded in  $\text{CDCl}_3$ . Inset shows the expansion.

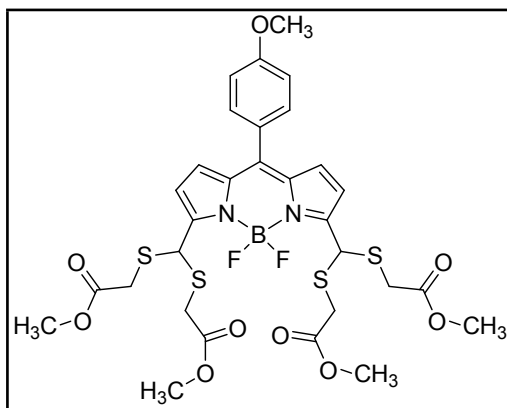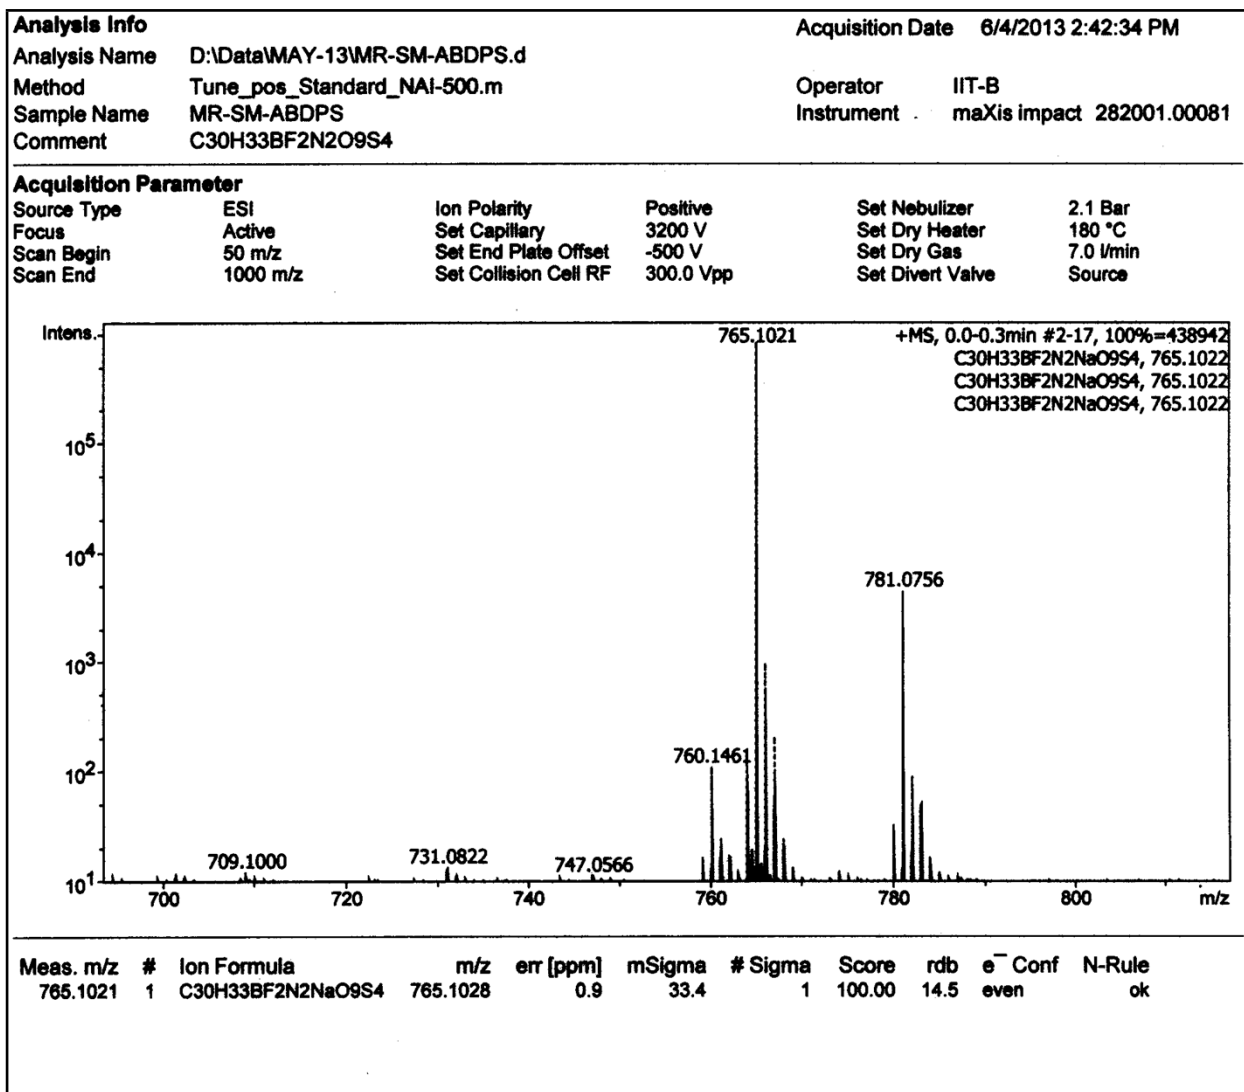

Figure S6: HR mass spectrum of BODIPY 2

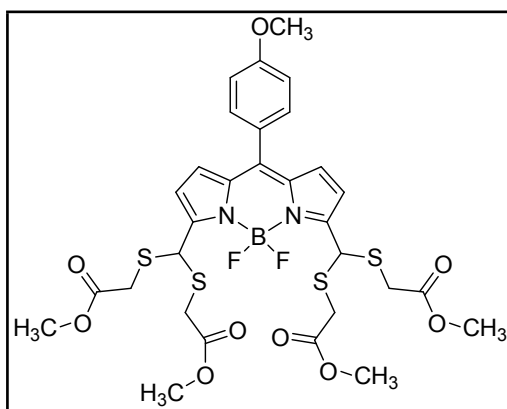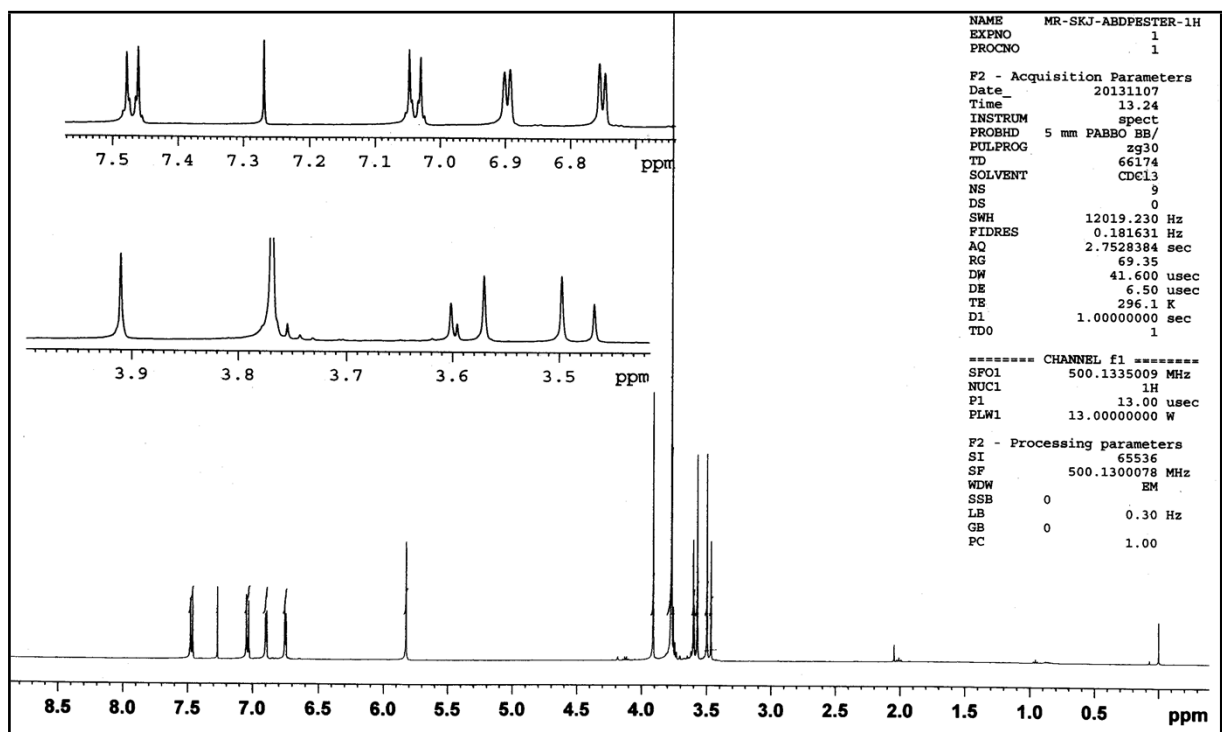

**Figure S7:**  $^1\text{H}$  NMR spectrum of BODIPY **2** recorded in  $\text{CDCl}_3$





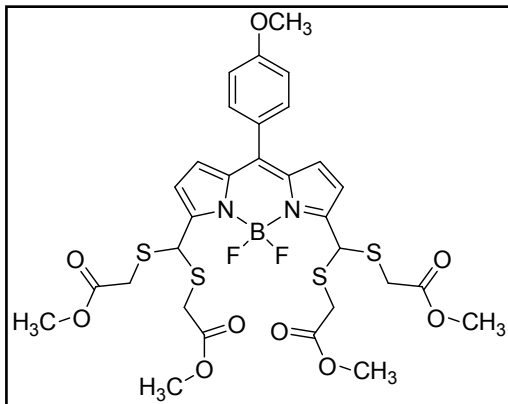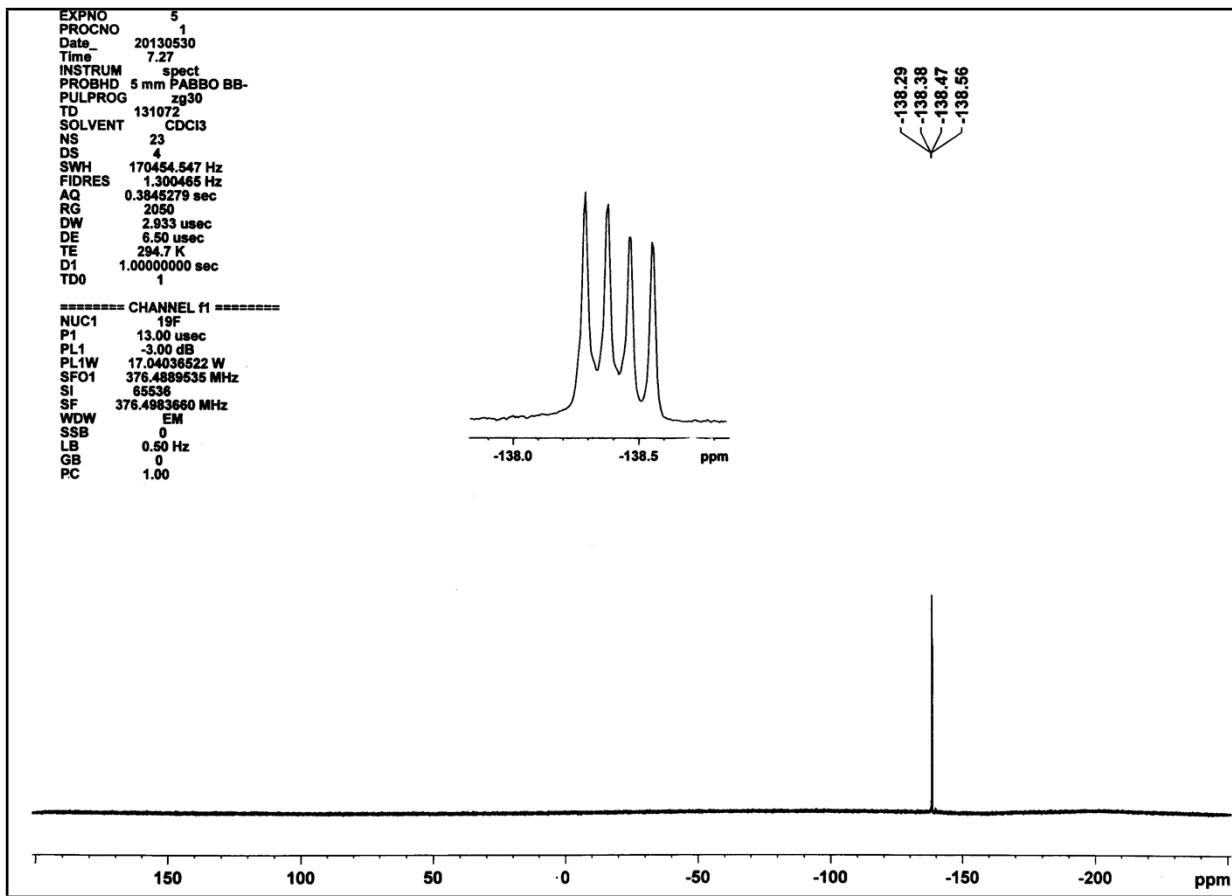

**Figure S9:**  $^{19}\text{F}$  NMR spectrum of BODIPY **2** recorded in  $\text{CDCl}_3$ . Inset shows the expansion

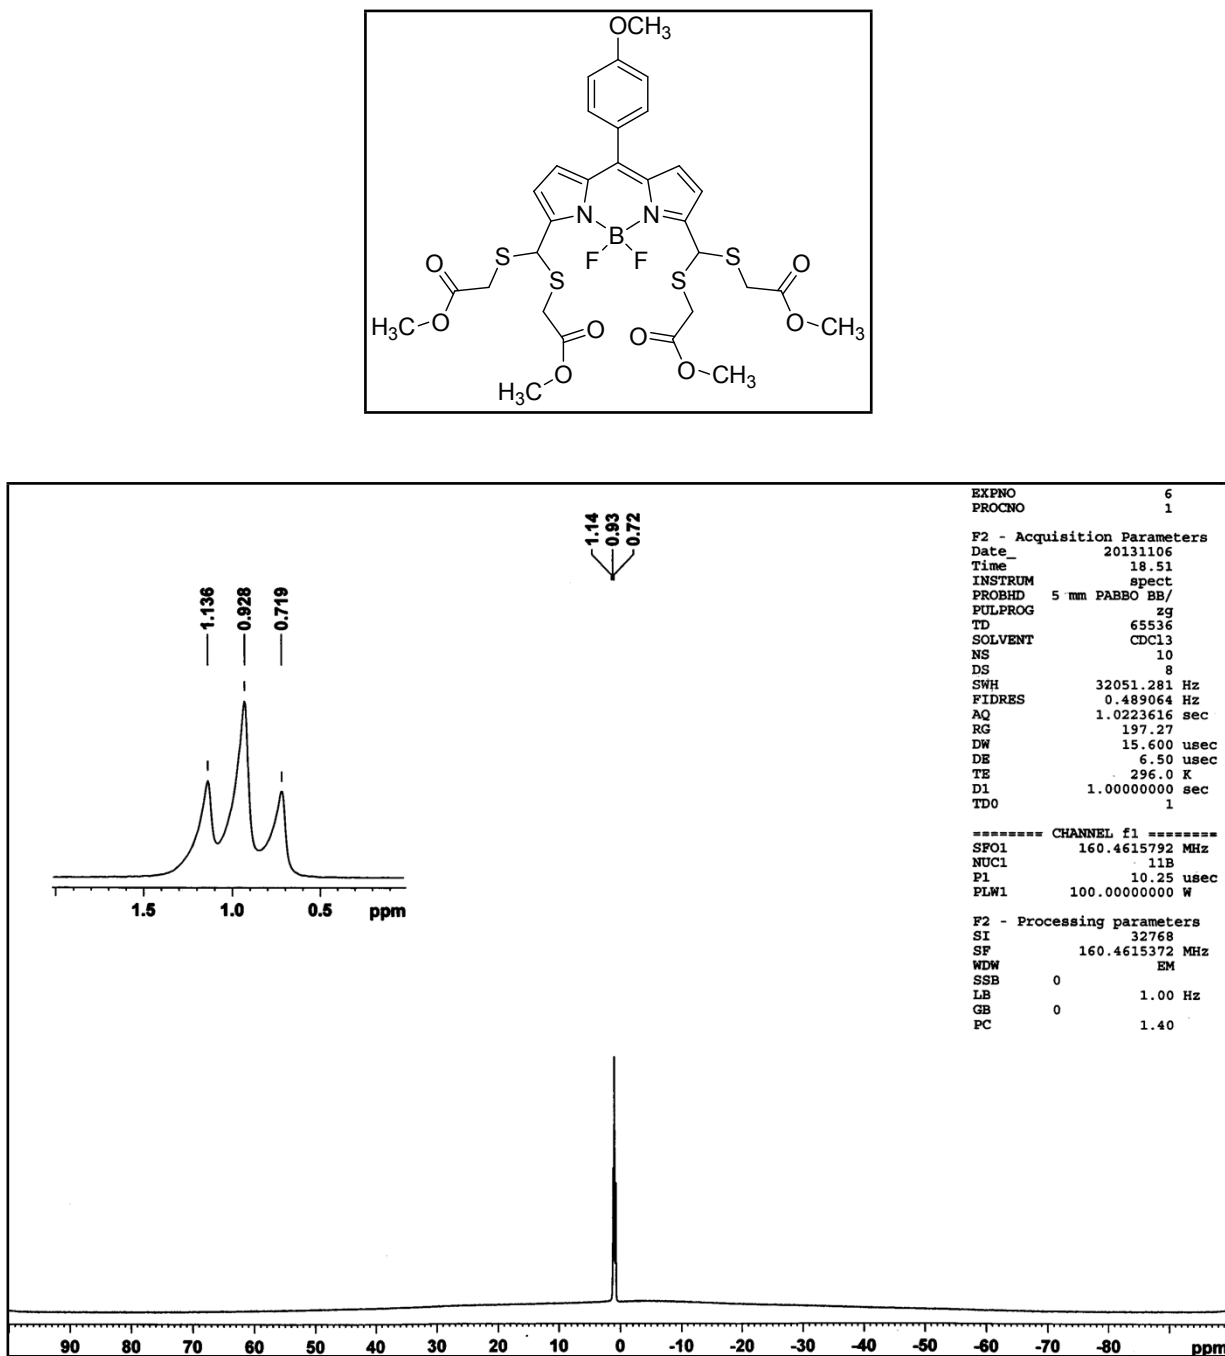

**Figure S10:** <sup>11</sup>B NMR spectrum of BODIPY **2** recorded in CDCl<sub>3</sub>. Inset shows the expansion.

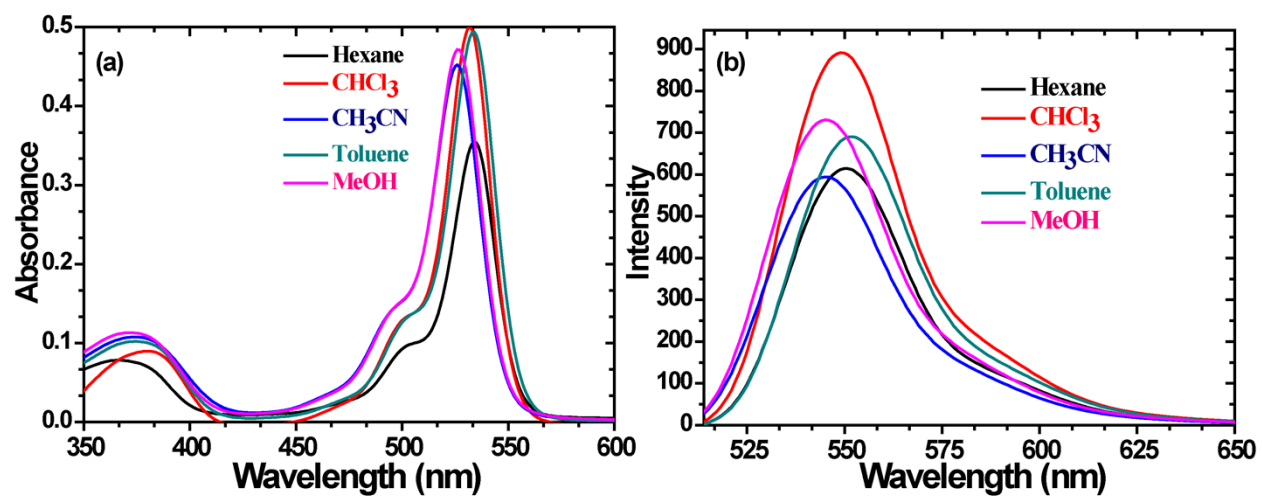

**Figure S11:** a) Absorption, b) emission spectra of BODIPY 1 (5  $\mu\text{M}$ ) recorded in different solvents. Excitation wavelength used was 488 nm.

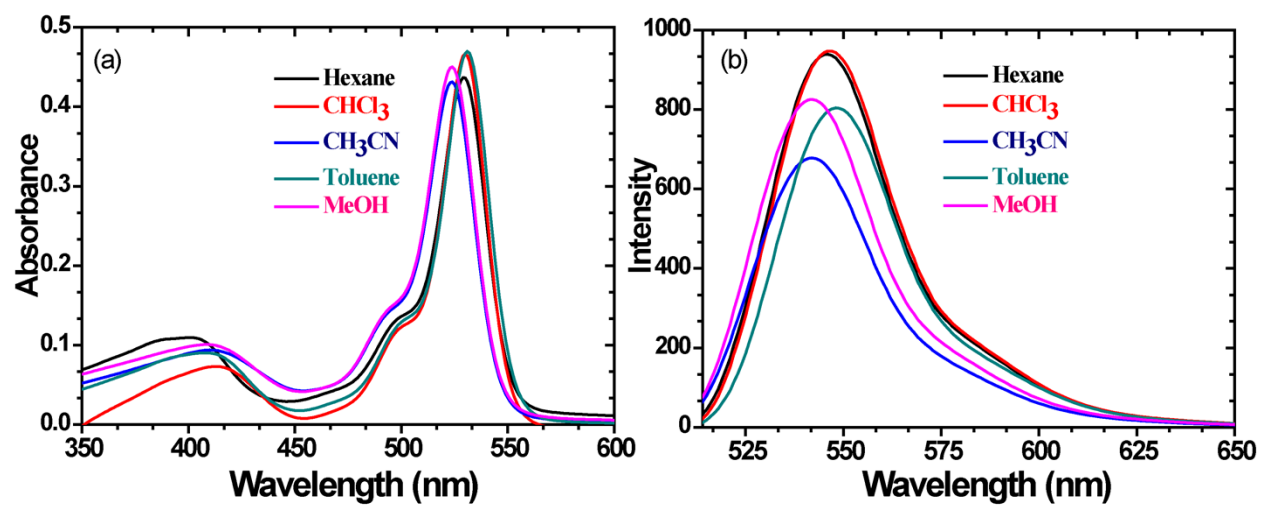

**Figure S12:** a) Absorption, b) emission spectra of BODIPY 2 (5  $\mu\text{M}$ ) recorded in different solvents. Excitation wavelength used was 488 nm.

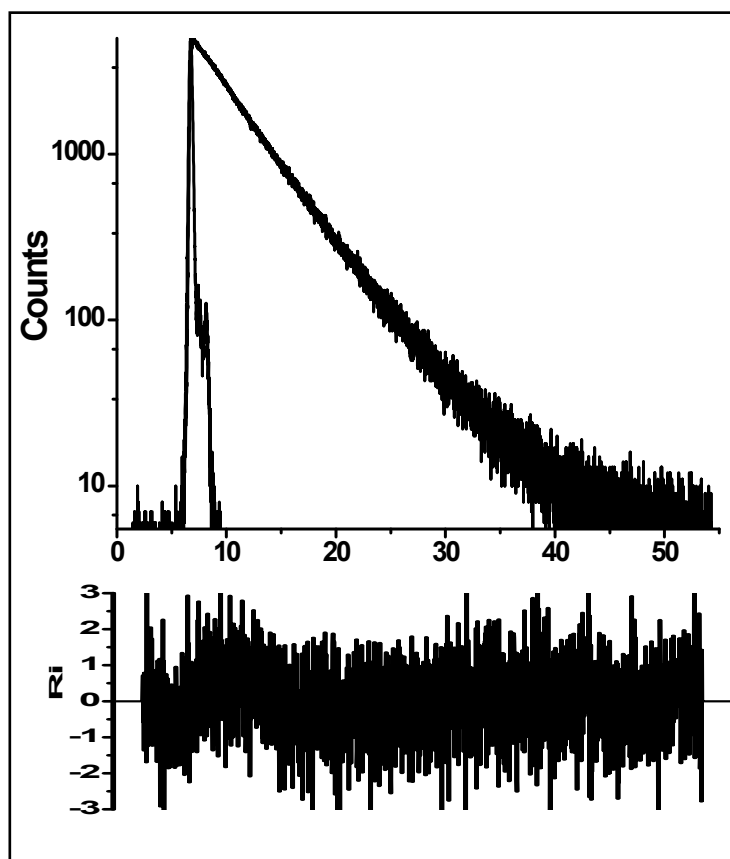

**Figure S13:** Fluorescence-decay profile and the corresponding weighted residual-distribution fit of the fluorescence decay of BODIPY **1** in  $\text{CHCl}_3$ . The excitation wavelength used was 440 nm and emission was detected at the emission-peak maxima (549 nm) of BODIPY **1**.

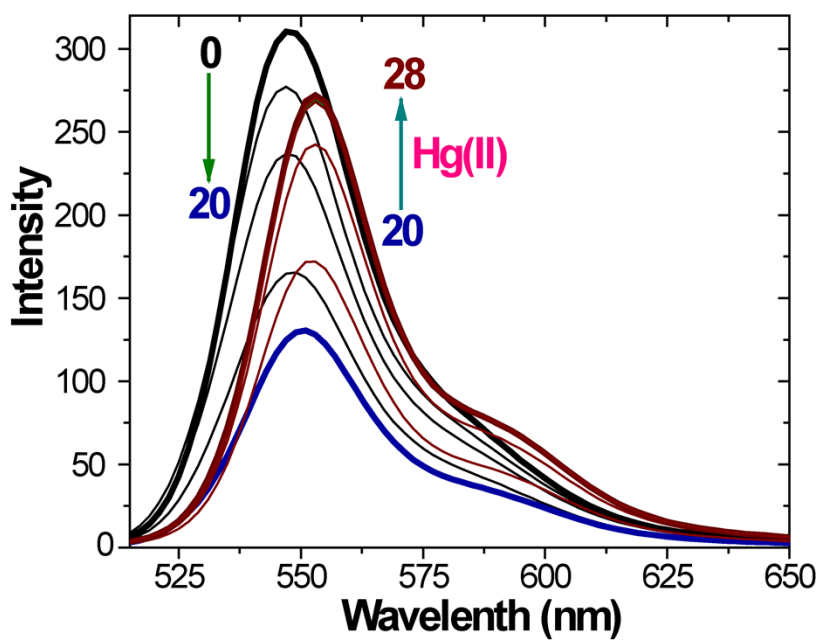

**Figure S14:** Emission spectral changes of BODIPY **1** (5 μM) upon addition of increasing equivalents of Hg<sup>2+</sup> ions (HgCl<sub>2</sub>) in CH<sub>3</sub>CN/PBS (8:2; v/v, pH 7.4). The spectra were recorded after the addition of Hg<sup>2+</sup> ion to BODIPY **1** for 10 min.

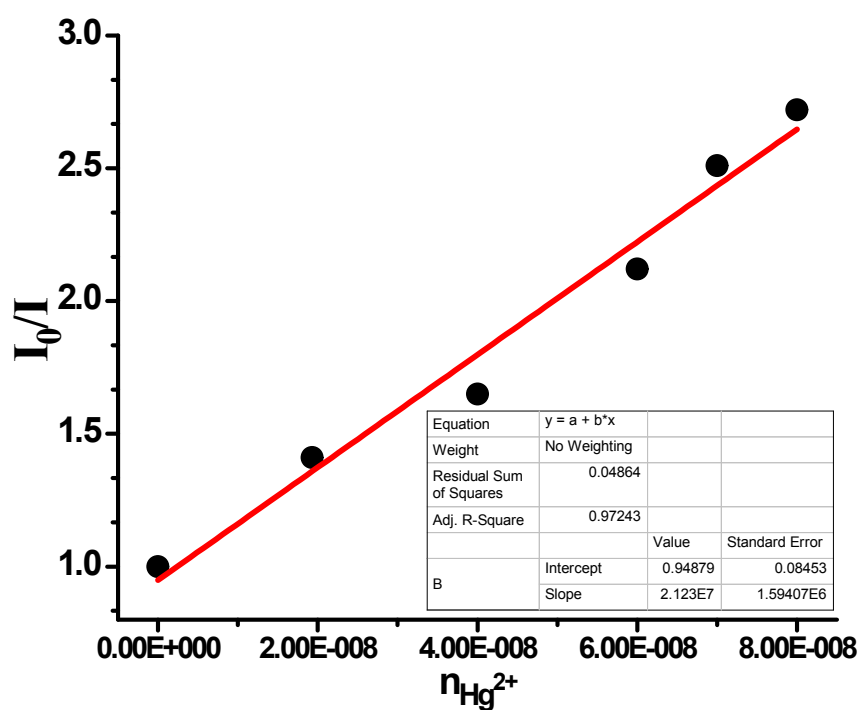

**Figure S15:** The linear dynamic fluorescence response for the titration of BODIPY **1** with  $\text{F}^-$  ion to determine the detection limit (LOD). The LOD was calculated using the formula  $3\sigma/k$ , where  $\sigma$  = standard deviation of blank (10 samples) and  $k$  = the slope of linear calibration curve.



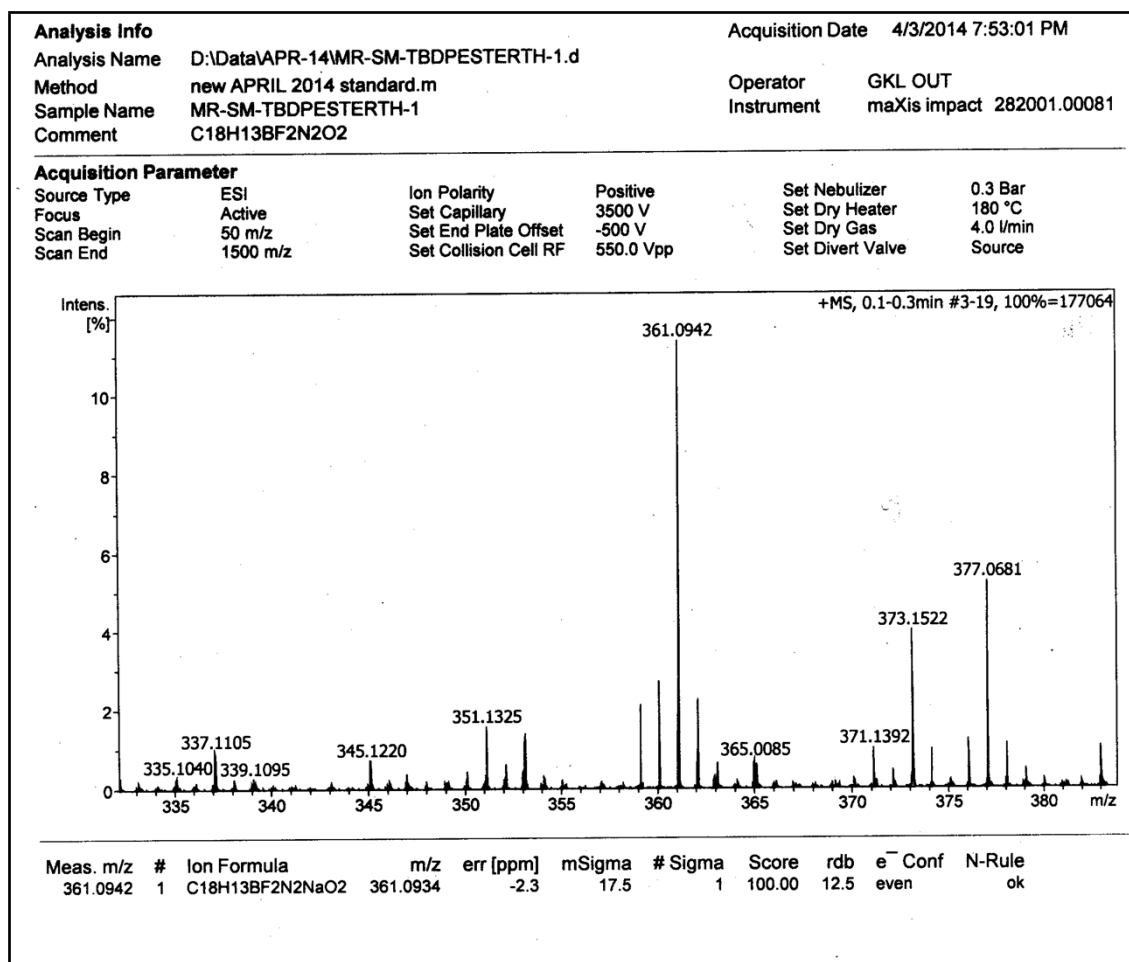

**Figure S16:** HR-MS spectrum showing the molecular ion peak for the formation of compound **3** during titration of BODIPY **1** with Hg(II) ion.
